# Supplementary material
Source: PubMed Central journal article supplement (PMC7160756)

## Supplementary Online Content

Lala A, Rowland JC, Ferket BS, et al. Strategies of wait-listing for heart transplant vs durable mechanical circulatory support alone for patients with advanced heart failure. *JAMA Cardiol*. Published online April 15, 2020. doi:10.1001/jamacardio.2020.0631

**eTable 1.** BTT LVAD vs DT LVAD After Propensity Score Matching

**eTable 2.** BTT LVAD Not Transplanted vs BTT Transplanted From Matched Dataset

**eTable 3.** BTT LVAD Not Transplanted vs DT LVAD From Matched Dataset

**eTable 4.** BTT LVAD vs DT LVAD Patients Who Ultimately Were Transplanted

**eTable 5.** Patients From Analysis Dataset Compared to Patients Who Were Excluded Solely for Missing Albumin

**eFigure 1.** Propensity Matching

**eFigure 2.** Strategy of Listing for Transplant vs DT LVAD Broken Down by 6 Age Groups

**eFigure 3.** Survival Analysis by Younger (<65 years) and Older ( $\geq$ 65 years) Patients According to Strategy

**eFigure 4.** Worst-case Scenario Survival Curves Comparing Strategies of Listing of Transplant (With Or Without LVAD) to DT LVAD Where Delisted Patients Are Assumed Dead Within 1 Week

This supplementary material has been provided by the authors to give readers additional information about their work.

**eTable 1. BTT LVAD vs DT LVAD After Propensity Score Matching**

|                      | BTT<br>(n=2131)      | DT<br>(n=2131)       | P Value |
|----------------------|----------------------|----------------------|---------|
| Age, yrs             | 56.00 [47.00, 63.00] | 68.00 [64.00, 72.00] | <0.001  |
| Race                 |                      |                      | <0.001  |
| Asian (Non-Hispanic) | 38 (1.8)             | 16 (0.8)             |         |
| Black (Non-Hispanic) | 524 (24.6)           | 351 (16.5)           |         |
| Hispanic             | 79 (3.7)             | 46 (2.2)             |         |
| Other                | 149 (7.0)            | 107 (5.0)            |         |
| White (Non-Hispanic) | 1341 (62.9)          | 1611 (75.6)          |         |
| BMI                  | 28.17±5.78           | 29.15±6.31           | <0.001  |
| Male                 | 1699 (79.7)          | 1668 (78.3)          | 0.259   |
| Blood Type           |                      |                      | <0.001  |
| A                    | 715 (33.6)           | 829 (38.9)           |         |
| AB                   | 52 (2.4)             | 86 (4.0)             |         |
| B                    | 263 (12.3)           | 240 (11.3)           |         |
| O                    | 1101 (51.7)          | 976 (45.8)           |         |
| Creatinine, mg/dL    | 1.39±0.81            | 1.49±0.67            | <0.001  |
| Albumin, g/dL        | 3.48±0.67            | 3.26±0.66            | <0.001  |
| INTERMACS Profile    |                      |                      | <0.001  |
| 1                    | 319 (15.0)           | 224 (10.5)           |         |
| 2                    | 908 (42.6)           | 558 (26.2)           |         |
| 3                    | 590 (27.7)           | 758 (35.6)           |         |
| 4+                   | 314 (14.7)           | 591 (27.7)           |         |

\*Categorical measures are presented as the number of patients and (%). Continuous measures are presented as median [interquartile range (IQR)] or mean ± standard deviation (SD).

**eTable 2. BTT LVAD Not Transplanted vs BTT Transplanted From Matched Dataset**

|                      | BTT-No TXPL<br>(n=1031) | BTT-TXPL<br>(n=1100) | p Value |
|----------------------|-------------------------|----------------------|---------|
| Age, yrs             | 57.00 [48.00, 63.00]    | 55.00 [46.00, 62.00] | 0.007   |
| Race                 |                         |                      | 0.03    |
| Asian (Non-Hispanic) | 13 (1.3)                | 25 (2.3)             |         |
| Black (Non-Hispanic) | 281 (27.3)              | 243 (22.1)           |         |
| Hispanic             | 39 (3.8)                | 40 (3.6)             |         |
| Other                | 66 (6.4)                | 83 (7.5)             |         |
| White (Non-Hispanic) | 632 (61.3)              | 709 (64.5)           |         |
| BMI                  | 28.55±6.08              | 27.81±5.47           | 0.003   |
| Male                 | 809 (78.5)              | 890 (80.9)           | 0.178   |
| Blood Type           |                         |                      | <0.001  |
| A                    | 315 (30.6)              | 400 (36.4)           |         |
| AB                   | 22 (2.1)                | 30 (2.7)             |         |
| B                    | 111 (10.8)              | 152 (13.8)           |         |
| O                    | 583 (56.5)              | 518 (47.1)           |         |
| Creatinine, mg/dL    | 1.41±0.88               | 1.37±0.73            | 0.217   |
| Albumin, g/dL        | 3.46±0.65               | 3.49±0.69            | 0.246   |
| INTERMACS Profile    |                         |                      | 0.66    |
| 1                    | 158 (15.3)              | 161 (14.6)           |         |
| 2                    | 428 (41.5)              | 480 (43.6)           |         |
| 3                    | 296 (28.7)              | 294 (26.7)           |         |
| 4+                   | 149 (14.5)              | 165 (15.0)           |         |

\*Categorical measures are presented as the number of patients and (%). Continuous measures are presented as median [interquartile range (IQR)] or mean ± standard deviation (SD).

**eTable 3. BTT LVAD Not Transplanted vs DT LVAD From Matched Dataset**

|                      | BTT-No TXPL<br>(N=1031) | DT<br>(N=2131)       | p Value |
|----------------------|-------------------------|----------------------|---------|
| Age, yrs             | 57.00 [48.00, 63.00]    | 68.00 [64.00, 72.00] | <0.001  |
| Race                 |                         |                      | <0.001  |
| Asian (Non-Hispanic) | 13 (1.3)                | 16 (0.8)             |         |
| Black (Non-Hispanic) | 281 (27.3)              | 351 (16.5)           |         |
| Hispanic             | 39 (3.8)                | 46 (2.2)             |         |
| Other                | 66 (6.4)                | 107 (5.0)            |         |
| White (Non-Hispanic) | 632 (61.3)              | 1611 (75.6)          |         |
| BMI                  | 28.55±6.08              | 29.15±6.31           | 0.011   |
| Male                 | 809 (78.5)              | 1668 (78.3)          | 0.938   |
| Blood Type           |                         |                      | <0.001  |
| A                    | 315 (30.6)              | 829 (38.9)           |         |
| AB                   | 22 (2.1)                | 86 (4.0)             |         |
| B                    | 111 (10.8)              | 240 (11.3)           |         |
| O                    | 583 (56.5)              | 976 (45.8)           |         |
| Creatinine, mg/dL    | 1.41±0.88               | 1.49±0.67            | 0.01    |
| Albumin, g/dL        | 3.46±0.65               | 3.26±0.66            | <0.001  |
| INTERMACS Profile    |                         |                      | <0.001  |
| 1                    | 158 (15.3)              | 224 (10.5)           |         |
| 2                    | 428 (41.5)              | 558 (26.2)           |         |
| 3                    | 296 (28.7)              | 758 (35.6)           |         |
| 4+                   | 149 (14.5)              | 591 (27.7)           |         |

\*Categorical measures are presented as the number of patients and (%). Continuous measures are presented as median [interquartile range (IQR)] or mean ± standard deviation (SD).

**eTable 4. BTT LVAD vs DT LVAD Patients Who Ultimately Were Transplanted**

|                      | BTT<br>(N=2131)      | DT-TXPL<br>(N=161)   | p Value |
|----------------------|----------------------|----------------------|---------|
| Age, yrs             | 56.00 [47.00, 63.00] | 64.00 [60.00, 67.00] | <0.001  |
| Race                 |                      |                      | 0.115   |
| Asian (Non-Hispanic) | 38 (1.8)             | 0 (0.0)              |         |
| Black (Non-Hispanic) | 524 (24.6)           | 30 (18.6)            |         |
| Hispanic             | 79 (3.7)             | 4 (2.5)              |         |
| Other                | 149 (7.0)            | 12 (7.5)             |         |
| White (Non-Hispanic) | 1341 (62.9)          | 115 (71.4)           |         |
| BMI                  | 28.17±5.78           | 29.76±5.52           | 0.001   |
| Male                 | 1699 (79.7)          | 126 (78.3)           | 0.731   |
| Blood Type           |                      |                      | 0.001   |
| A                    | 715 (33.6)           | 69 (42.9)            |         |
| AB                   | 52 (2.4)             | 10 (6.2)             |         |
| B                    | 263 (12.3)           | 21 (13.0)            |         |
| O                    | 1101 (51.7)          | 61 (37.9)            |         |
| Creatinine, mg/dL    | 1.39±0.81            | 1.42±0.63            | 0.613   |
| Albumin, g/dL        | 3.48±0.67            | 3.13±0.74            | <0.001  |
| INTERMACS Profile    |                      |                      | <0.001  |
| 1                    | 319 (15.0)           | 25 (15.5)            |         |
| 2                    | 908 (42.6)           | 32 (19.9)            |         |
| 3                    | 590 (27.7)           | 57 (35.4)            |         |
| 4+                   | 314 (14.7)           | 47 (29.2)            |         |

\*Categorical measures are presented as the number of patients and (%). Continuous measures are presented as median [interquartile range (IQR)] or mean ± standard deviation (SD).

**eTable 5. Patients From Analysis Dataset Compared to Patients Who Were Excluded Solely for Missing Albumin**

|                      | Total Cohort<br>(N=8281) | Missing Albumin<br>(N=2316) | p Value |
|----------------------|--------------------------|-----------------------------|---------|
| Age, yrs             | 59.00 [50.00, 66.00]     | 57.00 [47.00, 64.00]        | <0.001  |
| Race                 |                          |                             | <0.001  |
| Asian (Non-Hispanic) | 176 (2.1)                | 65 (2.8)                    |         |
| Black (Non-Hispanic) | 1919 (23.2)              | 555 (24.0)                  |         |
| Hispanic             | 418 (5.0)                | 169 (7.3)                   |         |
| Other                | 367 (4.4)                | 53 (2.3)                    |         |
| White (Non-Hispanic) | 5401 (65.2)              | 1474 (63.6)                 |         |
| BMI                  | 27.96±6.08               | 27.64±5.99                  | 0.024   |
| Male                 | 6335 (76.5)              | 1703 (73.5)                 | 0.003   |
| Blood Type           |                          |                             | 0.551   |
| A                    | 3183 (38.4)              | 866 (37.4)                  |         |
| AB                   | 400 (4.8)                | 115 (5.0)                   |         |
| B                    | 1113 (13.4)              | 336 (14.5)                  |         |
| O                    | 3585 (43.3)              | 999 (43.1)                  |         |
| Creatinine, mg/dL    | 1.37±0.67                | 1.44±0.75                   | <0.001  |
| Albumin, g/dL        | 3.48±0.67                | ---                         | NA      |

\*Categorical measures are presented as the number of patients and (%). Continuous measures are presented as median [interquartile range (IQR)] or mean ± standard deviation (SD).

## eFigure 1. Propensity Matching

- a. Predicted overlap with propensity matching for key clinical factors between patients listed for transplant (with or without BTT LVAD) and DT LVAD patients

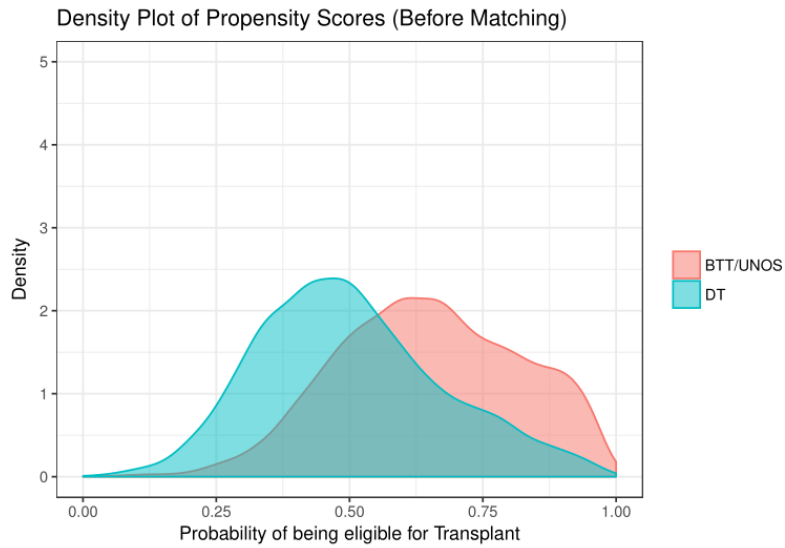

- b. Actual overlap after matching

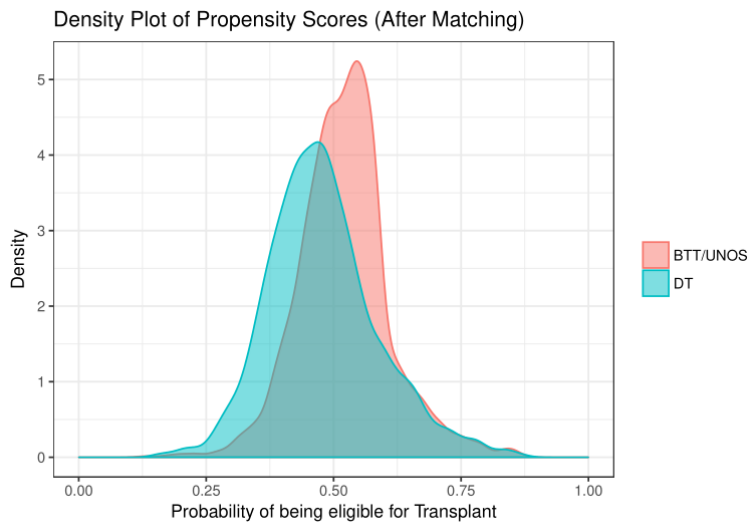

**eFigure 2. Strategy of Listing for Transplant vs DT LVAD Broken Down by 6 Age Groups**

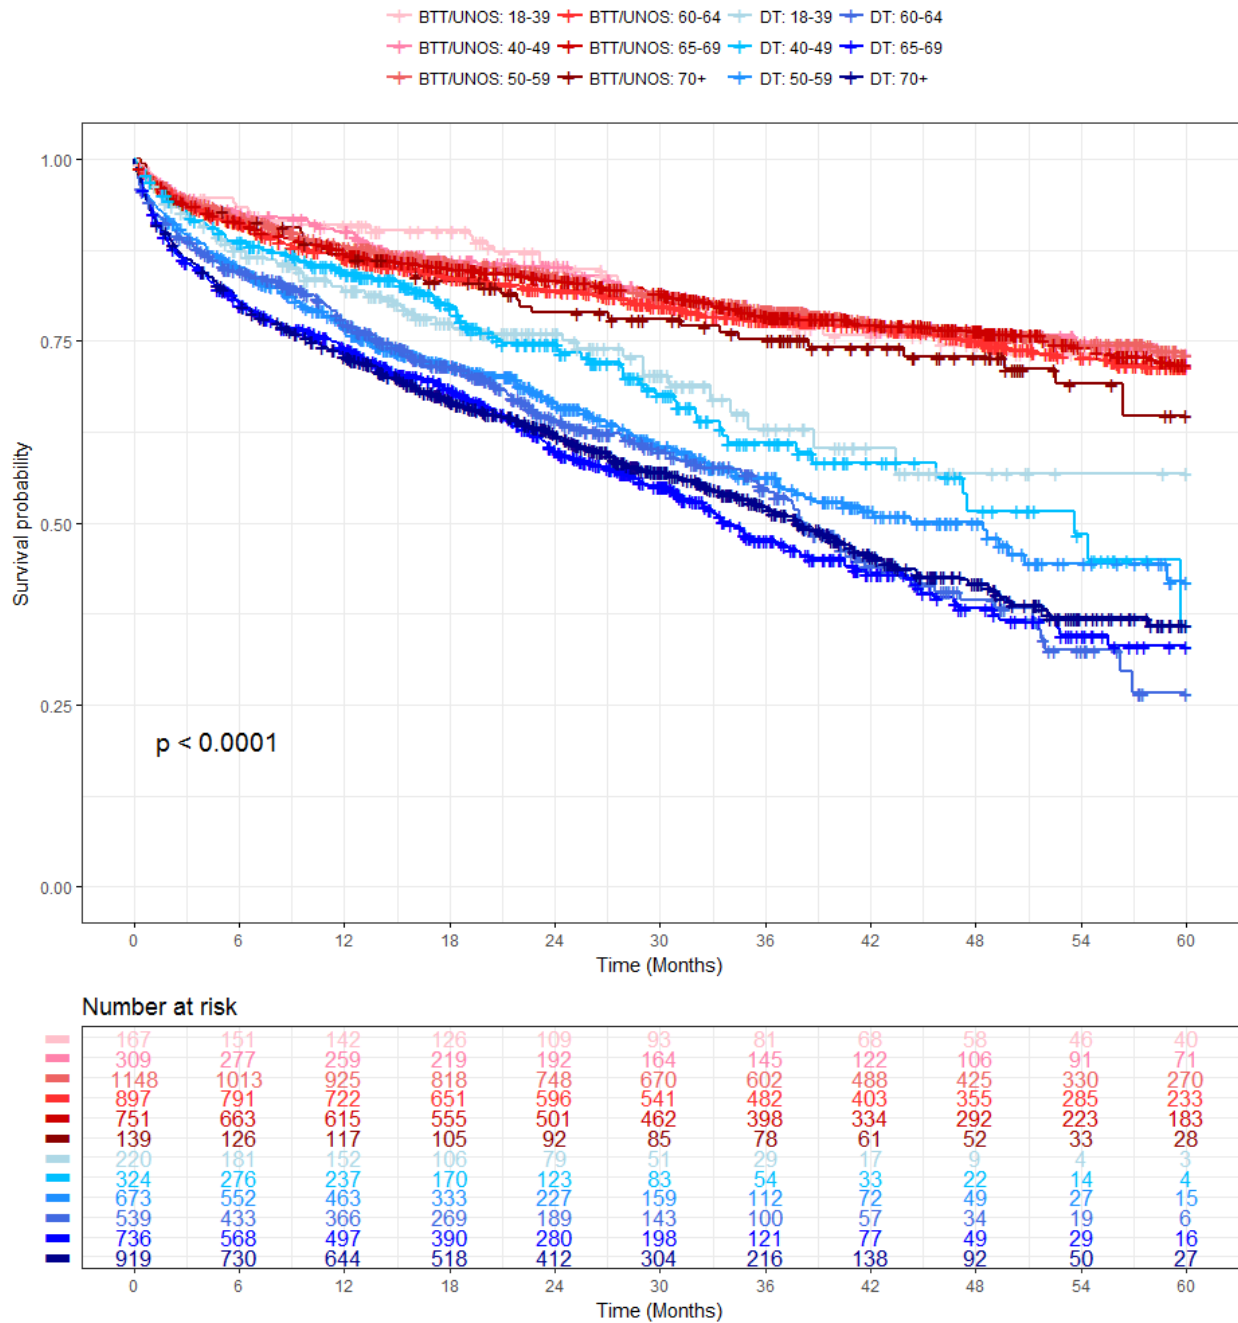



**eFigure 3. Survival Analysis by Younger (<65 Years) and Older (≥65 Years) Patients According to Strategy**

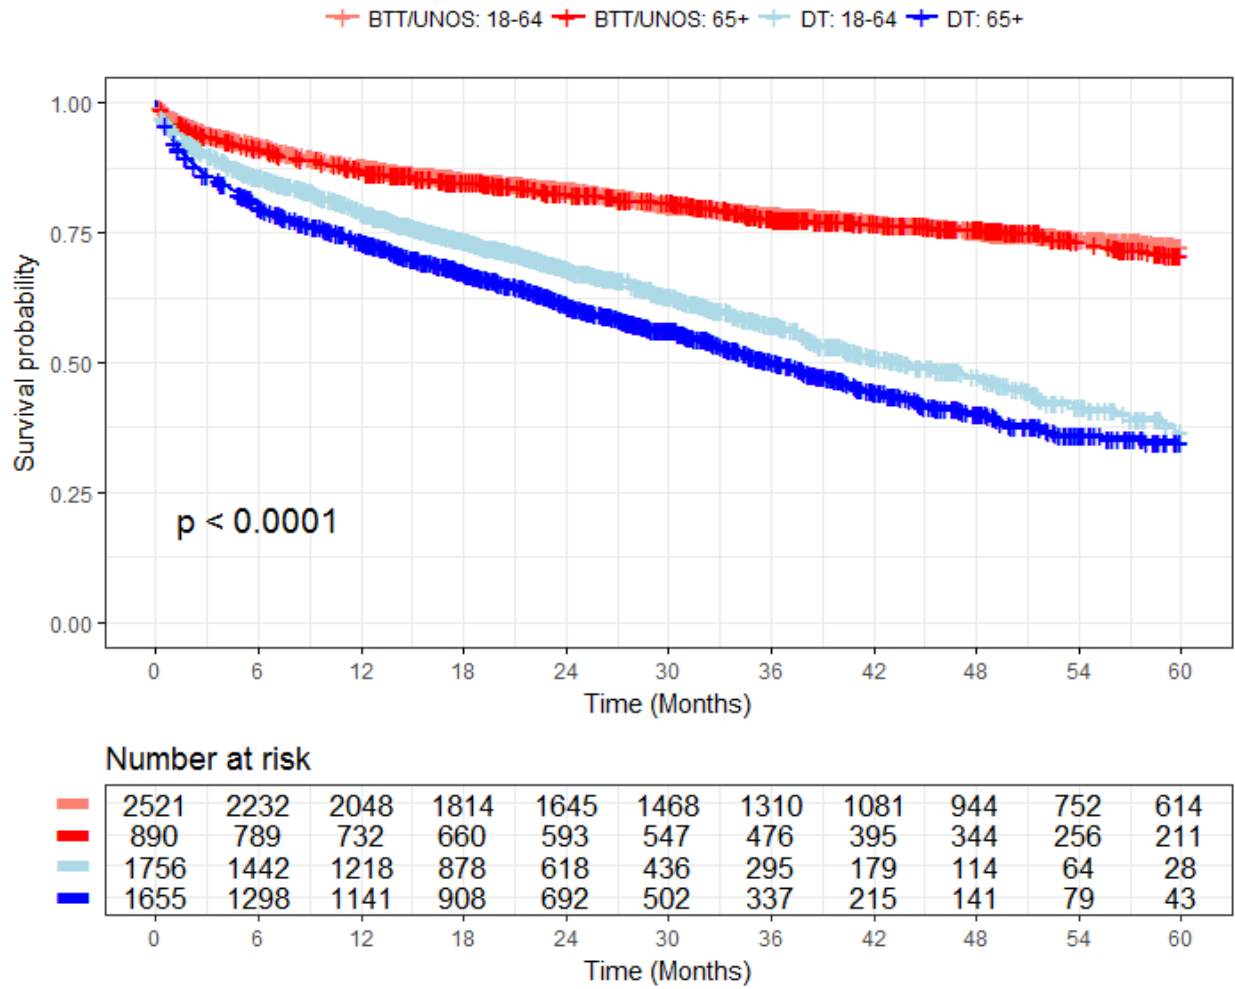

**eFigure 4. Worst-case Scenario Survival Curves Comparing Strategies of Listing of Transplant (With or Without LVAD) to DT LVAD Where Delisted Patients Are Assumed Dead Within 1 Week**

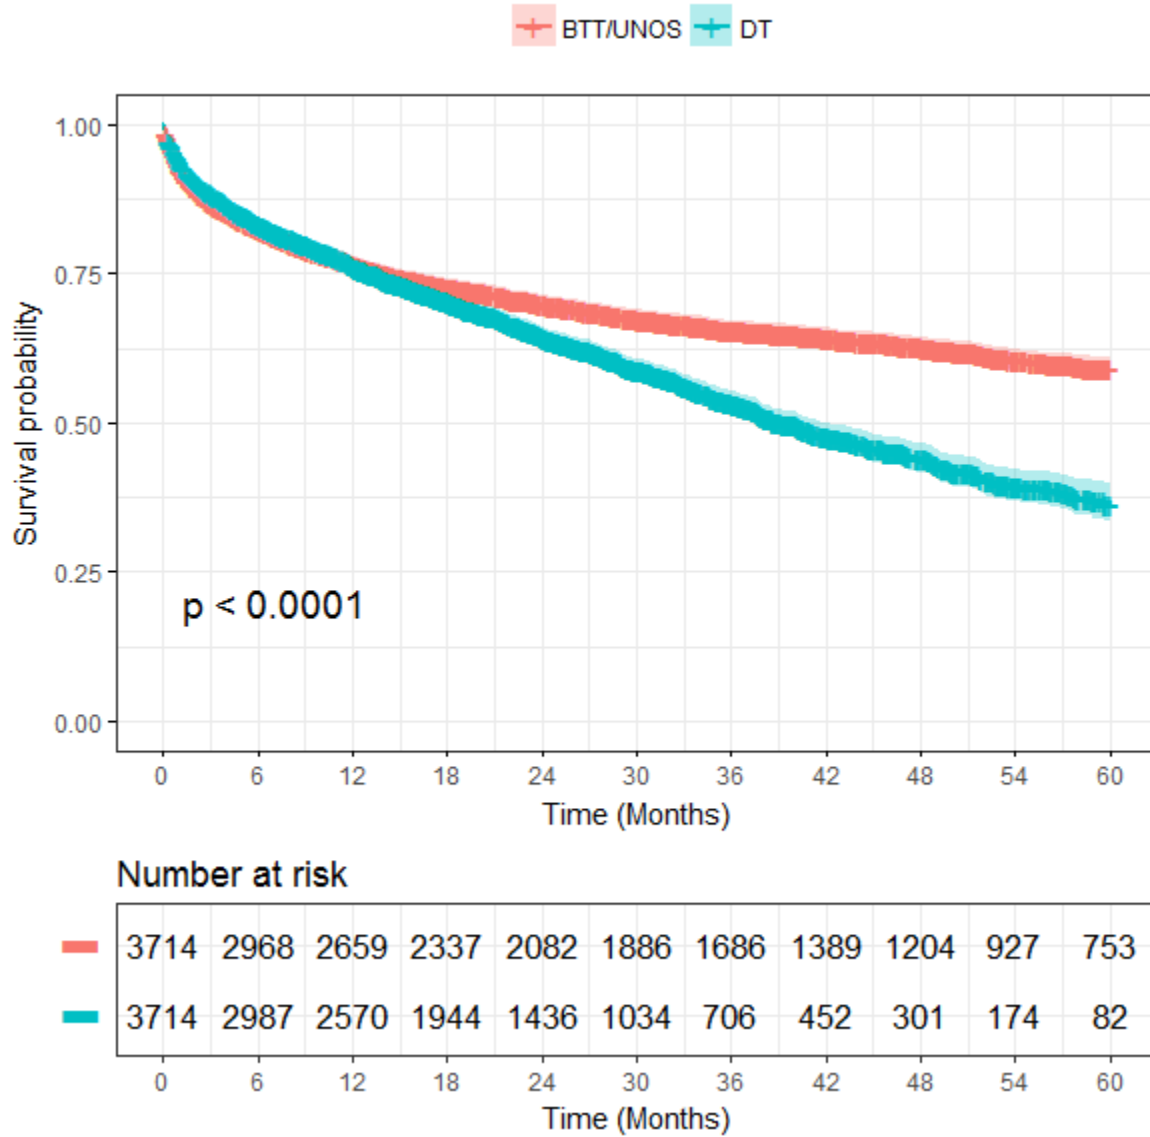

Supplement: jamacardiol-5-652-s001.pdf [file jamacardiol-5-652-s001.pdf]
